# Supplementary material
Source: PubMed Central journal article supplement (PMC7156965)

Figure 4A

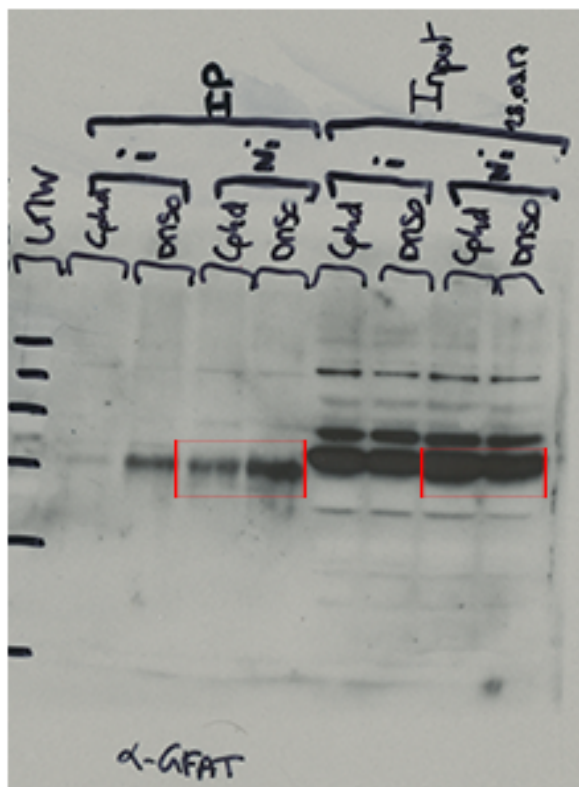

Figure 4B

|         |   |   |   |   |   |   |   |   |
|---------|---|---|---|---|---|---|---|---|
| TG2     | + | - | - | + | + | + | + | - |
| BP      | + | - | + | + | + | - | + | + |
| EGTA    | + | - | - | - | + | - | - | - |
| rhGFPT1 | + | + | + | + | + | - | - | - |

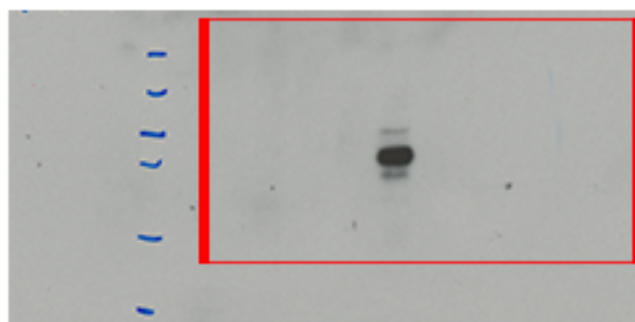

Figure 4C  
streptavidin-HRP

Raw data from Pxi4  
Lane 1: WT  
Lane 2: Q328N  
Lane 3: Q58N  
Lane 6: Q555N

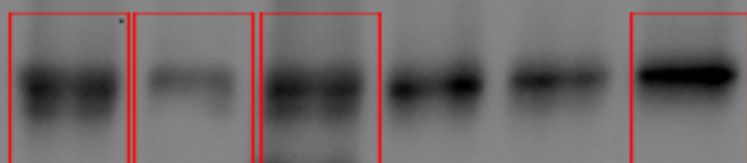

anti-GFPT

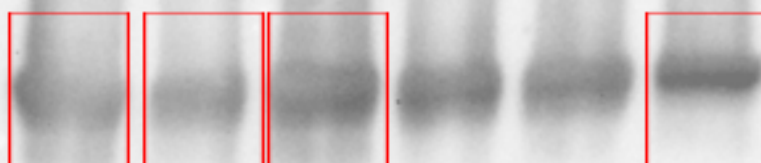

Supplement: EMBJ-39-e102166-s004.pdf [file EMBJ-39-e102166-s004.pdf]
