# Supplementary material
Source: PubMed Central journal article supplement (PMC7156965)

Figure 6A  
O-GlcNAc and actin

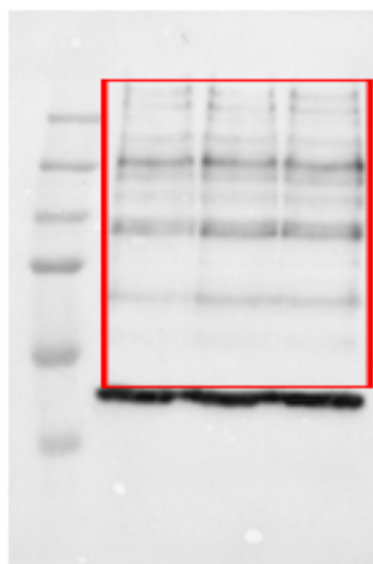

GFPT (samples reloaded)

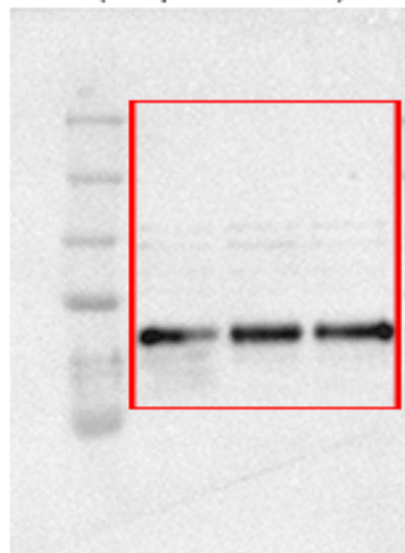

Figure 6B  
O-GlcNAc

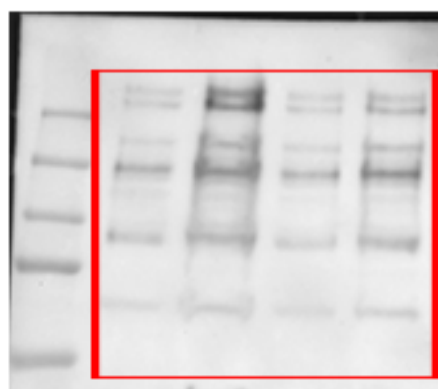

actin

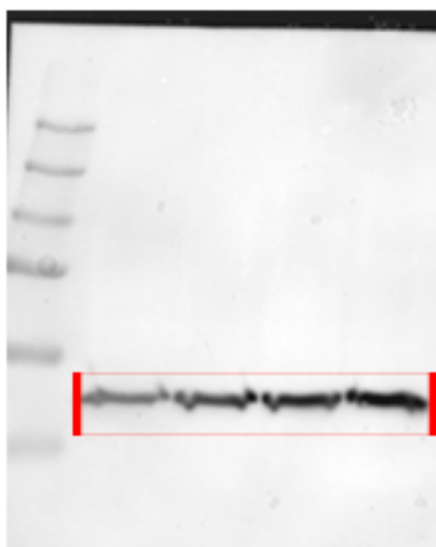

GFPT (samples re-loaded)

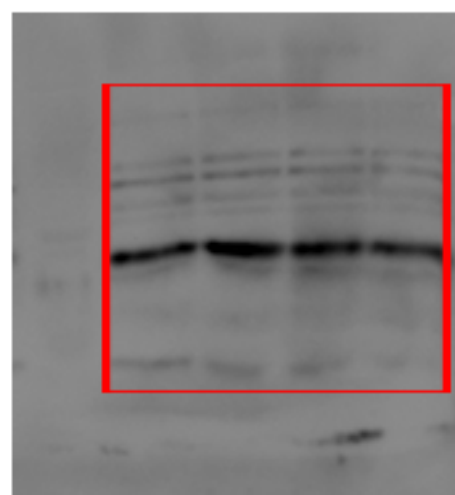

Figure 6C

GFPT

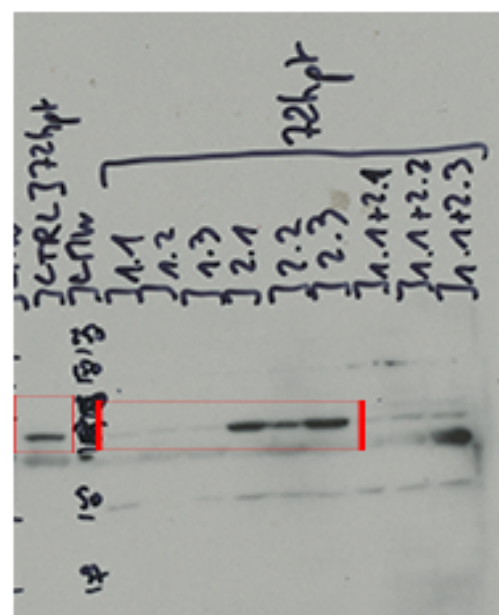

actin

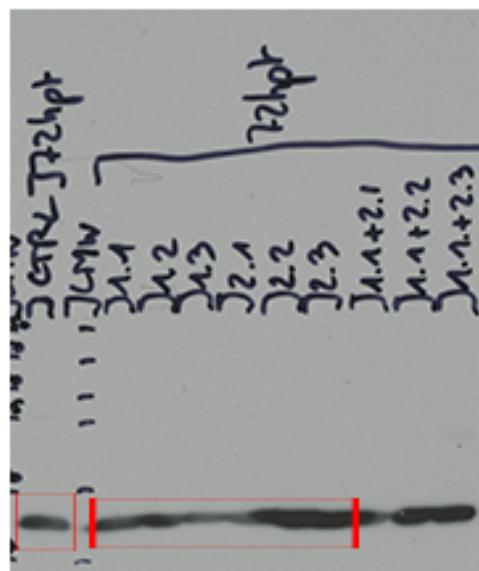

Supplement: EMBJ-39-e102166-s006.pdf [file EMBJ-39-e102166-s006.pdf]
