# Supplementary material
Source: PubMed Central journal article supplement (PMC7156965)

Figure 5B

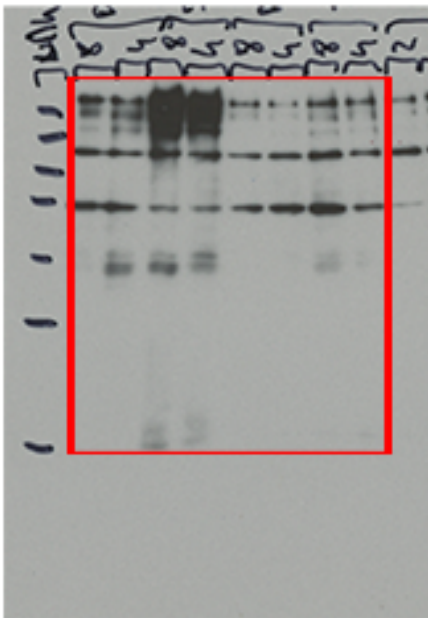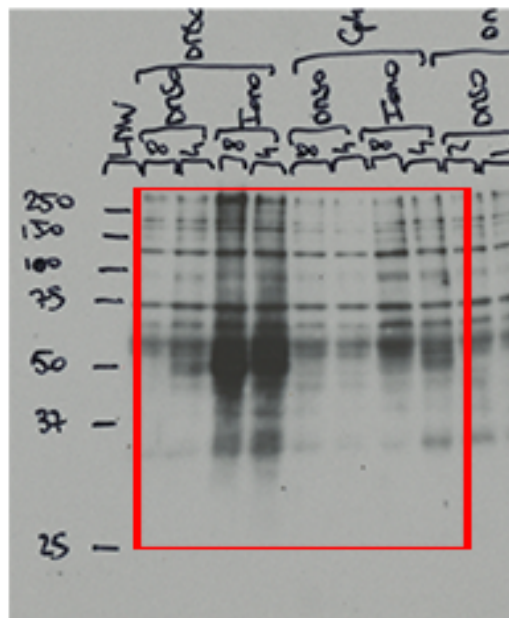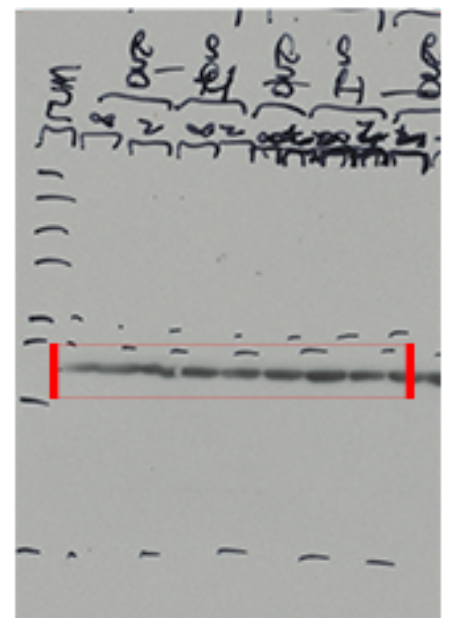

Figure 5C

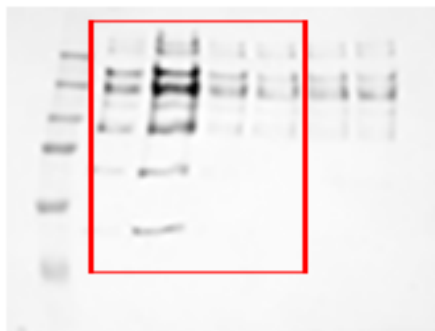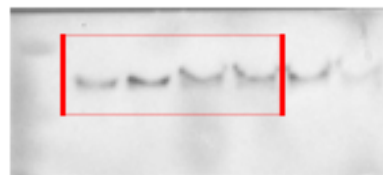

Supplement: EMBJ-39-e102166-s005.pdf [file EMBJ-39-e102166-s005.pdf]
